# Supplementary material for: RNA Viruses, Pregnancy and Vaccination: Emerging Lessons from COVID-19 and Ebola Virus Disease
Source: MDPI journal article supplement (doi:10.3390/pathogens11070800), 2022-07-15
Supplement: s1 [file s1]

**Supplementary Table S1. Immunomodulatory approaches for COVID-19 and EVD**

| Disease  | Therapeutic Strategy          | Drug                                  | Target                   | Mode of administration        | Status/Study details                                                             | Reference                                                                                                                                                                                                                                                                                                                                                                                                                                                                                                                                                                                                                                                                   |
|----------|-------------------------------|---------------------------------------|--------------------------|-------------------------------|----------------------------------------------------------------------------------|-----------------------------------------------------------------------------------------------------------------------------------------------------------------------------------------------------------------------------------------------------------------------------------------------------------------------------------------------------------------------------------------------------------------------------------------------------------------------------------------------------------------------------------------------------------------------------------------------------------------------------------------------------------------------------|
| COVID-19 | Anti-cytokines                | Anakinra                              | IL-1R receptor           | IV, SC                        | NCT04603742-Phase 2, NCT04443881 & NCT04362111-Phase 3                           | <a href="https://link.springer.com/article/10.1007/s11010-021-04325-9">https://link.springer.com/article/10.1007/s11010-021-04325-9</a><br><a href="https://link.springer.com/article/10.1007/s00011-021-01445-2">https://link.springer.com/article/10.1007/s00011-021-01445-2</a><br><a href="https://link.springer.com/article/10.1007/s11010-021-04325-9">https://link.springer.com/article/10.1007/s11010-021-04325-9</a><br><a href="https://www.ncbi.nlm.nih.gov/pmc/articles/PMC7252146/">https://www.ncbi.nlm.nih.gov/pmc/articles/PMC7252146/</a>                                                                                                                  |
|          |                               | IL-37 & IL-38                         | IL-18Ra receptor & IL-1b | -                             | In-vitro                                                                         | <a href="https://www.ncbi.nlm.nih.gov/pmc/articles/PMC7252146/">https://www.ncbi.nlm.nih.gov/pmc/articles/PMC7252146/</a>                                                                                                                                                                                                                                                                                                                                                                                                                                                                                                                                                   |
|          |                               | Tocilizumab                           | IL-6 receptor            | IV                            | NCT04445272, NCT04317092 & NCT04412772- Phase 2                                  | <a href="https://link.springer.com/article/10.1007/s11010-021-04325-9">https://link.springer.com/article/10.1007/s11010-021-04325-9</a><br><a href="https://link.springer.com/article/10.1007/s00011-021-01445-2">https://link.springer.com/article/10.1007/s00011-021-01445-2</a><br><a href="https://www.ncbi.nlm.nih.gov/pmc/articles/PMC7252146/">https://www.ncbi.nlm.nih.gov/pmc/articles/PMC7252146/</a><br><a href="https://www.frontiersin.org/articles/10.3389/fimmu.2020.01949/full">https://www.frontiersin.org/articles/10.3389/fimmu.2020.01949/full</a><br><a href="https://pubmed.ncbi.nlm.nih.gov/33946736/">https://pubmed.ncbi.nlm.nih.gov/33946736/</a> |
|          |                               | Sarilumab                             | IL-6 receptor            | IV                            | NCT04315298 & NCT04327388-Phase3                                                 | <a href="https://www.ncbi.nlm.nih.gov/pmc/articles/PMC7441891/">https://www.ncbi.nlm.nih.gov/pmc/articles/PMC7441891/</a><br><a href="https://www.ncbi.nlm.nih.gov/pmc/articles/PMC7441891/">https://www.ncbi.nlm.nih.gov/pmc/articles/PMC7441891/</a>                                                                                                                                                                                                                                                                                                                                                                                                                      |
|          | Janus Kinase (JAK) Inhibitors | Baricitinib, Baricitinib + Remdesivir | JAK1 & JAK2              | Oral Tablet, Oral Tablet + IV | NCT04321993-Phase 2, NCT04358614, NCT05074420, NCT04421027 & NCT04640168-Phase 3 | <a href="https://link.springer.com/article/10.1007/s11010-021-04325-9">https://link.springer.com/article/10.1007/s11010-021-04325-9</a><br><a href="https://www.ncbi.nlm.nih.gov/pmc/articles/PMC7252146/">https://www.ncbi.nlm.nih.gov/pmc/articles/PMC7252146/</a>                                                                                                                                                                                                                                                                                                                                                                                                        |

|  |          |                                     |                     |                  |                                                          |                                                                                                                                                                                                                                                                                                                                                                                                                                                                                                                                              |
|--|----------|-------------------------------------|---------------------|------------------|----------------------------------------------------------|----------------------------------------------------------------------------------------------------------------------------------------------------------------------------------------------------------------------------------------------------------------------------------------------------------------------------------------------------------------------------------------------------------------------------------------------------------------------------------------------------------------------------------------------|
|  |          |                                     |                     |                  |                                                          | <a href="https://link.springer.com/article/10.1007/s11010-021-04325-9">https://link.springer.com/article/10.1007/s11010-021-04325-9</a><br><br><a href="https://www.frontiersin.org/articles/10.3389/fimmu.2020.01949/full">https://www.frontiersin.org/articles/10.3389/fimmu.2020.01949/full</a><br><br><a href="https://www.ncbi.nlm.nih.gov/pmc/articles/PMC7441891/">https://www.ncbi.nlm.nih.gov/pmc/articles/PMC7441891/</a><br><br><a href="https://pubmed.ncbi.nlm.nih.gov/33946736/">https://pubmed.ncbi.nlm.nih.gov/33946736/</a> |
|  |          | Ruxolitinib                         | JAK1 & JAK2         | Oral tablet      | NCT04334044- Phase-2 & NCT04362137 - Phase 3             | <a href="https://www.mdpi.com/1424-8247/13/8/188/htm">https://www.mdpi.com/1424-8247/13/8/188/htm</a><br><br><a href="https://www.ncbi.nlm.nih.gov/pmc/articles/PMC7441891/">https://www.ncbi.nlm.nih.gov/pmc/articles/PMC7441891/</a><br><br><a href="https://pubmed.ncbi.nlm.nih.gov/33946736/">https://pubmed.ncbi.nlm.nih.gov/33946736/</a><br><br><a href="https://www.ncbi.nlm.nih.gov/pmc/articles/PMC7441891/">https://www.ncbi.nlm.nih.gov/pmc/articles/PMC7441891/</a>                                                             |
|  | Anti-TNF | Infliximab                          | TNF $\alpha$        | IV               | NCT04425538 - Phase 2, NCT04593940 & NCT04330690-Phase 3 | <a href="https://link.springer.com/article/10.1007/s11010-021-04325-9">https://link.springer.com/article/10.1007/s11010-021-04325-9</a><br><br><a href="https://www.frontiersin.org/articles/10.3389/fimmu.2020.01949/full">https://www.frontiersin.org/articles/10.3389/fimmu.2020.01949/full</a><br><br><a href="https://pubmed.ncbi.nlm.nih.gov/33946736/">https://pubmed.ncbi.nlm.nih.gov/33946736/</a>                                                                                                                                  |
|  |          | Adalimumab                          | TNF $\alpha$        | SC               | NCT04705844-withdrawn                                    | <a href="https://pubmed.ncbi.nlm.nih.gov/33946736/">https://pubmed.ncbi.nlm.nih.gov/33946736/</a>                                                                                                                                                                                                                                                                                                                                                                                                                                            |
|  | GM-CSF   | Sargramostim/Leukine                | rhuGM-CSF           | Nebulization, IV | NCT04411680, NCT04569877-Phase 2 & NCT04326920- Phase 4  | <a href="https://link.springer.com/article/10.1007/s40265-020-01367-z">https://link.springer.com/article/10.1007/s40265-020-01367-z</a>                                                                                                                                                                                                                                                                                                                                                                                                      |
|  |          | Gimsilumab,                         | GM-CSF              | IV               | NCT04351243-Phase 2                                      | <a href="https://www.ncbi.nlm.nih.gov/pmc/articles/PMC7441891/">https://www.ncbi.nlm.nih.gov/pmc/articles/PMC7441891/</a>                                                                                                                                                                                                                                                                                                                                                                                                                    |
|  |          | Lenzilumab, Lenzilumab + Remdesivir | GM-CSF, IL1 $\beta$ | IV               | NCT04583969-Phase 2 & NCT04351152- Phase 3               | <a href="https://www.ncbi.nlm.nih.gov/pmc/articles/PMC7441891/">https://www.ncbi.nlm.nih.gov/pmc/articles/PMC7441891/</a>                                                                                                                                                                                                                                                                                                                                                                                                                    |

|  |                     |                    |                                  |                       |                                                                                           |                                                                                                                                                                                                                                                                |
|--|---------------------|--------------------|----------------------------------|-----------------------|-------------------------------------------------------------------------------------------|----------------------------------------------------------------------------------------------------------------------------------------------------------------------------------------------------------------------------------------------------------------|
|  |                     | Namilumab          | GM-CSF                           | IV                    | ISRCTN40580903                                                                            | <a href="https://www.ncbi.nlm.nih.gov/pmc/articles/PMC8676420/">https://www.ncbi.nlm.nih.gov/pmc/articles/PMC8676420/</a>                                                                                                                                      |
|  |                     | Mavrilimumab       | GM-CSF $\alpha$ receptor         | IV                    | NCT04492514, NCT04463004 & NCT04399980-Phase 2 & NCT04447469-Phase 3                      | <a href="https://www.ncbi.nlm.nih.gov/pmc/articles/PMC7441891/">https://www.ncbi.nlm.nih.gov/pmc/articles/PMC7441891/</a>                                                                                                                                      |
|  | Convalescent plasma | Neutralizing Abs   | -                                | IV                    | NCT04412486- Early phase 1, NCT04456413, NCT04384497-Phase 2 & NCT04873414-Phase 3        | <a href="https://www.mdpi.com/1424-8247/13/8/188/htm">https://www.mdpi.com/1424-8247/13/8/188/htm</a><br><a href="https://pubmed.ncbi.nlm.nih.gov/33946736/">https://pubmed.ncbi.nlm.nih.gov/33946736/</a>                                                     |
|  | IVIG                | -                  | T & B-cell, Fc $\gamma$ receptor | IV                    | NCT05350774, NCT04432324 & NCT04521309-Phase 2,                                           | <a href="https://www.ncbi.nlm.nih.gov/pmc/articles/PMC7252146/">https://www.ncbi.nlm.nih.gov/pmc/articles/PMC7252146/</a><br><a href="https://pubmed.ncbi.nlm.nih.gov/33946736/">https://pubmed.ncbi.nlm.nih.gov/33946736/</a>                                 |
|  | Corticosteroids     | Dexamethasone      | -                                | IV, Oral & Intranasal | NCT04707534-Phase 4, NCT04603729, NCT04509973, NCT05293210-Phase 3 & NCT04513184-Phase 2  | <a href="https://link.springer.com/article/10.1007/s11010-021-04325-9">https://link.springer.com/article/10.1007/s11010-021-04325-9</a>                                                                                                                        |
|  |                     | Methylprednisolone | -                                | IV                    | NCT04780581-Phase 4, NCT04499313, NCT04673162 & NCT04438980-Phase 3 & NCT05350774-Phase 2 | <a href="https://link.springer.com/article/10.1007/s40265-020-01367-z">https://link.springer.com/article/10.1007/s40265-020-01367-z</a>                                                                                                                        |
|  |                     | Budesonide         | ACE2 receptor                    | Inhalation            | NCT04964414 & NCT04416399-Phase 2, NCT04361474-Phase 3 & NCT04355637-Phase 4              | <a href="https://www.ncbi.nlm.nih.gov/pmc/articles/PMC8040526/">https://www.ncbi.nlm.nih.gov/pmc/articles/PMC8040526/</a><br><a href="https://erj.ersjournals.com/content/59/3/2103036.abstract">https://erj.ersjournals.com/content/59/3/2103036.abstract</a> |

|                                  |  |                    |                                     |                  |                                                                  |                                                                                                                                                                                                                                                                                                                                                                                                                             |
|----------------------------------|--|--------------------|-------------------------------------|------------------|------------------------------------------------------------------|-----------------------------------------------------------------------------------------------------------------------------------------------------------------------------------------------------------------------------------------------------------------------------------------------------------------------------------------------------------------------------------------------------------------------------|
|                                  |  | <b>Ciclesonide</b> | -                                   | Inhalation       | NCT04381364-Phase 2 & NCT04377711-Phase 3                        | <a href="https://journals.asm.org/doi/pdf/10.1128/JVI.01648-20">https://journals.asm.org/doi/pdf/10.1128/JVI.01648-20</a>                                                                                                                                                                                                                                                                                                   |
| Interferons                      |  | IFN- $\alpha$ 2b   | IFN receptor (IFNAR)                | Nebulization     | NCT04988217, NCT04480138 & NCT04379518-Phase 2                   | <a href="https://www.mdpi.com/1424-8247/13/8/188/html">https://www.mdpi.com/1424-8247/13/8/188/html</a><br><a href="https://www.frontiersin.org/articles/10.3389/fimmu.2020.01949/full">https://www.frontiersin.org/articles/10.3389/fimmu.2020.01949/full</a>                                                                                                                                                              |
|                                  |  | IFN- $\beta$ 1b    | IFN $\alpha/\beta$ receptor (IFNAR) | Nebulization, SC | NCT04988217, NCT04343768 & NCT04647695 -Phase 2                  | <a href="https://link.springer.com/article/10.1007/s11010-021-04325-9">https://link.springer.com/article/10.1007/s11010-021-04325-9</a><br><a href="https://www.frontiersin.org/articles/10.3389/fimmu.2020.01949/full">https://www.frontiersin.org/articles/10.3389/fimmu.2020.01949/full</a><br><a href="https://www.ncbi.nlm.nih.gov/pmc/articles/PMC7445008/">https://www.ncbi.nlm.nih.gov/pmc/articles/PMC7445008/</a> |
|                                  |  | Emapalumab         | IFN $\gamma$ receptor               | IV               | NCT04324021                                                      | <a href="https://www.ncbi.nlm.nih.gov/pmc/articles/PMC7441891/">https://www.ncbi.nlm.nih.gov/pmc/articles/PMC7441891/</a>                                                                                                                                                                                                                                                                                                   |
| Sphingosine-1-receptor modulator |  | Fingolimod         | lymphocyte                          | Oral             | NCT04280588-withdrawn & NCT04796584-recruiting                   | <a href="https://www.ncbi.nlm.nih.gov/pmc/articles/PMC7441891/">https://www.ncbi.nlm.nih.gov/pmc/articles/PMC7441891/</a><br><a href="https://pubmed.ncbi.nlm.nih.gov/32784499/">https://pubmed.ncbi.nlm.nih.gov/32784499/</a>                                                                                                                                                                                              |
| Monoclonal Ab                    |  | Bevacizumab        | VEGF                                | IV               | NCT04275414-Phase 2, NCT04822818-Phase 3                         | <a href="https://www.ncbi.nlm.nih.gov/pmc/articles/PMC7441891/">https://www.ncbi.nlm.nih.gov/pmc/articles/PMC7441891/</a>                                                                                                                                                                                                                                                                                                   |
| Anti-complement therapy          |  | Eculizumab         | complement protein C5               | IV               | NCT04355494-no longer available & NCT04346797-Phase 2            | <a href="https://www.ncbi.nlm.nih.gov/pmc/articles/PMC7441891/">https://www.ncbi.nlm.nih.gov/pmc/articles/PMC7441891/</a>                                                                                                                                                                                                                                                                                                   |
| Synthetic VIP                    |  | Avipatidil         | TNF $\alpha$ & IL-6,                | IV, Inhalation   | NCT04311697, NCT04536350 & NCT04844580 -Phase 2                  | <a href="https://link.springer.com/article/10.1007/s11356-021-17824-5">https://link.springer.com/article/10.1007/s11356-021-17824-5</a>                                                                                                                                                                                                                                                                                     |
| -                                |  | Thalidomide        | PGE2, TNF $\alpha$ , IL-1, IL-6     | Not available    | NCT04273529-Phase 2                                              | <a href="https://www.ncbi.nlm.nih.gov/pmc/articles/PMC7441891/">https://www.ncbi.nlm.nih.gov/pmc/articles/PMC7441891/</a>                                                                                                                                                                                                                                                                                                   |
| Macrolides                       |  | Azithromycin       |                                     | Oral             | NCT04329832-Phase 2, NCT04332107-Terminated, NCT04381962-Phase 3 | <a href="https://link.springer.com/article/10.1007/s40265-020-01367-z">https://link.springer.com/article/10.1007/s40265-020-01367-z</a>                                                                                                                                                                                                                                                                                     |

|            |                                                |                                 |                                    |                |                                                                                                          |                                                                                                                                                                                                                                                                                                                                                                                                     |
|------------|------------------------------------------------|---------------------------------|------------------------------------|----------------|----------------------------------------------------------------------------------------------------------|-----------------------------------------------------------------------------------------------------------------------------------------------------------------------------------------------------------------------------------------------------------------------------------------------------------------------------------------------------------------------------------------------------|
|            |                                                | Clarithromycin                  | NAADP-stimulated lysosomal calcium | Oral           | NCT04398004- Phase 2, NCT04622891- not applicable                                                        | <a href="https://link.springer.com/article/10.1007/s40265-020-01367-z">https://link.springer.com/article/10.1007/s40265-020-01367-z</a><br><a href="https://www.sciencedirect.com/science/article/pii/S0166354216306167">https://www.sciencedirect.com/science/article/pii/S0166354216306167</a>                                                                                                    |
|            | -                                              | Thymalfsin/Thymosin $\alpha$ -1 | T-cell                             | SC, Nasal drop | NCT04428008, NCT04487444-Phase 2, & NCT04320238-Phase 3                                                  | <a href="https://pubmed.ncbi.nlm.nih.gov/32442287/">https://pubmed.ncbi.nlm.nih.gov/32442287/</a><br><a href="https://www.frontiersin.org/articles/10.3389/fimmu.2021.673693/full">https://www.frontiersin.org/articles/10.3389/fimmu.2021.673693/full</a>                                                                                                                                          |
|            | Colchicine                                     | -                               | NOD, LRR & NLRP3                   | Oral tablet    | NCT05038449-not yet started<br>NCT05118737-Early phase 1, NCT04355143, NCT04375202, NCT04360980-Phase 2, | <a href="https://link.springer.com/article/10.1007/s40265-020-01367-z">https://link.springer.com/article/10.1007/s40265-020-01367-z</a>                                                                                                                                                                                                                                                             |
|            | Statins                                        | Simvastatin                     | MyD88                              | Oral           | NCT04348695- Phase 2                                                                                     | <a href="https://link.springer.com/article/10.1007/s11010-021-04325-9">https://link.springer.com/article/10.1007/s11010-021-04325-9</a><br><a href="https://www.ncbi.nlm.nih.gov/pmc/articles/PMC7252146/">https://www.ncbi.nlm.nih.gov/pmc/articles/PMC7252146/</a>                                                                                                                                |
|            | Selective estrogen receptor modulators (SERMS) | Clomiphene                      | NPC1                               | -              | In-vitro                                                                                                 | <a href="https://www.ncbi.nlm.nih.gov/pmc/articles/PMC7578196/">https://www.ncbi.nlm.nih.gov/pmc/articles/PMC7578196/</a>                                                                                                                                                                                                                                                                           |
|            | Pan-Caspase inhibitor                          | Q-VD                            | caspase                            | -              | Invitro study                                                                                            | <a href="https://www.nature.com/articles/s41418-022-00936-x">https://www.nature.com/articles/s41418-022-00936-x</a>                                                                                                                                                                                                                                                                                 |
|            |                                                |                                 |                                    |                |                                                                                                          |                                                                                                                                                                                                                                                                                                                                                                                                     |
| <b>EVD</b> | Monoclonal Abs                                 | ZMapp                           | GP                                 | IV             | NCT02363322-Phase 1, NCT03719586-Phase 2                                                                 | <a href="https://pubmed.ncbi.nlm.nih.gov/28890666/">https://pubmed.ncbi.nlm.nih.gov/28890666/</a><br><a href="https://www.ncbi.nlm.nih.gov/pmc/articles/PMC6498552/">https://www.ncbi.nlm.nih.gov/pmc/articles/PMC6498552/</a>                                                                                                                                                                      |
|            |                                                | mAb114                          | VRC608                             | IV             | NCT03478891- Phase 1, NCT03719586- phase 3                                                               | <a href="https://www.sciencedirect.com/science/article/pii/S0140673619300364">https://www.sciencedirect.com/science/article/pii/S0140673619300364</a><br><a href="https://www.nejm.org/doi/full/10.1056/NEJMe1915350">https://www.nejm.org/doi/full/10.1056/NEJMe1915350</a><br><a href="https://www.nejm.org/doi/full/10.1056/NEJMe1915350">https://www.nejm.org/doi/full/10.1056/NEJMe1915350</a> |

|  |                             |                                   |                                     |    |                               |                                                                                                                                                                                                                                                                                                                                                                                                                                                                                        |
|--|-----------------------------|-----------------------------------|-------------------------------------|----|-------------------------------|----------------------------------------------------------------------------------------------------------------------------------------------------------------------------------------------------------------------------------------------------------------------------------------------------------------------------------------------------------------------------------------------------------------------------------------------------------------------------------------|
|  |                             | REGN-EB3                          | GP                                  | IV | NCT03719586Phase 2/3          | <a href="https://www.nejm.org/doi/full/10.1056/NEJMe1915350">https://www.nejm.org/doi/full/10.1056/NEJMe1915350</a>                                                                                                                                                                                                                                                                                                                                                                    |
|  |                             | $\alpha$ -IL-6R mAbs              | IL-6                                | IV | In-vivo                       | <a href="https://www.frontiersin.org/articles/10.3389/fphar.2020.574703/full">https://www.frontiersin.org/articles/10.3389/fphar.2020.574703/full</a>                                                                                                                                                                                                                                                                                                                                  |
|  |                             | Gamezumab                         | -                                   | -  | NCT04717830-Phase 1           | <a href="https://clinicaltrials.gov/ct2/show/NCT04717830?term=Gamezumab&amp;cond=ebola&amp;draw=2&amp;rank=1">https://clinicaltrials.gov/ct2/show/NCT04717830?term=Gamezumab&amp;cond=ebola&amp;draw=2&amp;rank=1</a>                                                                                                                                                                                                                                                                  |
|  | RNA synthesis               | TKM-Ebola                         |                                     | IV | NCT01518881-Terminated        | <a href="https://pubmed.ncbi.nlm.nih.gov/25630412/">https://pubmed.ncbi.nlm.nih.gov/25630412/</a><br><a href="https://www.ncbi.nlm.nih.gov/pmc/articles/PMC6498552/">https://www.ncbi.nlm.nih.gov/pmc/articles/PMC6498552/</a>                                                                                                                                                                                                                                                         |
|  | Macrolides                  | Azithromycin                      | -                                   | IV | NCT02380625- Phase 1          | <a href="https://link.springer.com/article/10.1007/s40506-017-0130-z">https://link.springer.com/article/10.1007/s40506-017-0130-z</a>                                                                                                                                                                                                                                                                                                                                                  |
|  | Topoisomerase II Inhibitors | Doxorubicin                       | IFN                                 | -  | Invitro study-cell line       | <a href="https://journals.asm.org/doi/pdf/10.1128/mBio.00368-17">https://journals.asm.org/doi/pdf/10.1128/mBio.00368-17</a>                                                                                                                                                                                                                                                                                                                                                            |
|  | Interferons                 | IFN- $\gamma$                     | IFN- $\gamma$ receptor (IFNGR)      | -  | Invitro study-mouse cell line | <a href="https://journals.plos.org/plospathogens/article?id=10.1371/journal.ppat.1005263">https://journals.plos.org/plospathogens/article?id=10.1371/journal.ppat.1005263</a><br><a href="https://journals.plos.org/plospathogens/article?id=10.1371/journal.ppat.1005263">https://journals.plos.org/plospathogens/article?id=10.1371/journal.ppat.1005263</a>                                                                                                                         |
|  |                             | IFN- $\alpha$ & $\beta$           | IFN $\alpha/\beta$ receptor (IFNAR) | -  | invitro                       | <a href="https://academic-oup.com.proxy.lib.duke.edu/jid/article/179/Supplement_1/S188/881048">https://academic-oup.com.proxy.lib.duke.edu/jid/article/179/Supplement_1/S188/881048</a><br><a href="https://www.ncbi.nlm.nih.gov/pmc/articles/PMC5743218/">https://www.ncbi.nlm.nih.gov/pmc/articles/PMC5743218/</a>                                                                                                                                                                   |
|  |                             | Neplanocin A, 3-deazaneplanocin A | IFNs                                |    | In-vivo                       | <a href="https://www.ncbi.nlm.nih.gov/pmc/articles/PMC7110990/">https://www.ncbi.nlm.nih.gov/pmc/articles/PMC7110990/</a>                                                                                                                                                                                                                                                                                                                                                              |
|  | Covalent plasma             | Neutralizing Abs                  | Whole virus/GP                      | IV | Treatment in Guinea           | <a href="https://pubmed.ncbi.nlm.nih.gov/28890666/">https://pubmed.ncbi.nlm.nih.gov/28890666/</a><br><a href="https://www.ncbi.nlm.nih.gov/pmc/articles/PMC6498552/">https://www.ncbi.nlm.nih.gov/pmc/articles/PMC6498552/</a><br><a href="https://www.nejm.org/doi/10.1056/NEJMOa1511812">https://www.nejm.org/doi/10.1056/NEJMOa1511812</a><br><a href="https://link.springer.com/article/10.1007/s40506-017-0130-z">https://link.springer.com/article/10.1007/s40506-017-0130-z</a> |

|  |                                                         |                                                |                              |      |                     |                                                                                                                                                                                                                                                                                                                                                                                         |
|--|---------------------------------------------------------|------------------------------------------------|------------------------------|------|---------------------|-----------------------------------------------------------------------------------------------------------------------------------------------------------------------------------------------------------------------------------------------------------------------------------------------------------------------------------------------------------------------------------------|
|  | Agonist                                                 | Eritoran                                       | TLR                          | -    | In-vivo             | <a href="https://journals.asm.org/doi/10.1128/mBio.00226-17">https://journals.asm.org/doi/10.1128/mBio.00226-17</a>                                                                                                                                                                                                                                                                     |
|  | Nucleic acid analog                                     | Favipiravir (T705)                             | RNA polymerase               | Oral | NCT02662855 Phase 2 | <a href="https://www.ncbi.nlm.nih.gov/pmc/articles/PMC6498552/">https://www.ncbi.nlm.nih.gov/pmc/articles/PMC6498552/</a><br><a href="https://pubmed.ncbi.nlm.nih.gov/33068263/">https://pubmed.ncbi.nlm.nih.gov/33068263/</a><br><a href="https://www.sciencedirect.com/science/article/pii/S0166354214000576">https://www.sciencedirect.com/science/article/pii/S0166354214000576</a> |
|  |                                                         | BCX4430 (galidesivir)                          | Viral RNA polymerase         | IM   | NCT02319772 Phase 1 | <a href="https://link.springer.com/article/10.1007/s40506-017-0130-z">https://link.springer.com/article/10.1007/s40506-017-0130-z</a>                                                                                                                                                                                                                                                   |
|  |                                                         | GSK983                                         | dihydroorotate dehydrogenase | -    | In-vitro            | <a href="https://www.ncbi.nlm.nih.gov/pmc/articles/PMC6436837/">https://www.ncbi.nlm.nih.gov/pmc/articles/PMC6436837/</a>                                                                                                                                                                                                                                                               |
|  | Comb. Antisense phosphorodiamidate morpholino oligomers | AVI-6002                                       | VP24 and vP35                | IV   | NCT01353027 Phase 1 | <a href="https://pubmed.ncbi.nlm.nih.gov/25630412/">https://pubmed.ncbi.nlm.nih.gov/25630412/</a>                                                                                                                                                                                                                                                                                       |
|  | Selective estrogen receptor modulators (SERMS)          | Clomiphene                                     | VLPs and trVLPs              | -    | In-vitro            | <a href="https://www.ncbi.nlm.nih.gov/pmc/articles/PMC7110990/">https://www.ncbi.nlm.nih.gov/pmc/articles/PMC7110990/</a><br><a href="https://mdpi-res.com/viruses/viruses-08-00206/article_deploy/viruses-08-00206.pdf?version=1470137492">https://mdpi-res.com/viruses/viruses-08-00206/article_deploy/viruses-08-00206.pdf?version=1470137492</a>                                    |
|  | Indoline-based alkaloid-like derivative                 | CMLDBU3402                                     |                              | -    | -                   | <a href="https://pubmed.ncbi.nlm.nih.gov/25532798/">https://pubmed.ncbi.nlm.nih.gov/25532798/</a>                                                                                                                                                                                                                                                                                       |
|  | Viral entry fusion modulators                           | E-64d, E-64                                    | GP <sub>1,2</sub>            | -    | In-vitro            | <a href="https://pubmed.ncbi.nlm.nih.gov/25532798/">https://pubmed.ncbi.nlm.nih.gov/25532798/</a>                                                                                                                                                                                                                                                                                       |
|  |                                                         | Nilotinib & imatinib                           | c- Abl1 kinase               | -    | In-vitro            | <a href="https://pubmed.ncbi.nlm.nih.gov/25532798/">https://pubmed.ncbi.nlm.nih.gov/25532798/</a>                                                                                                                                                                                                                                                                                       |
|  |                                                         | Okadaic acid                                   | PP1 & PP2A,                  | -    | In-vitro            | <a href="https://pubmed.ncbi.nlm.nih.gov/25532798/">https://pubmed.ncbi.nlm.nih.gov/25532798/</a>                                                                                                                                                                                                                                                                                       |
|  | Endoplasmic reticulum (ER) glucosidase inhibitors       | IHVR11029, IHVR17028 & IHVR19029               | ER a-glucosidases I & II     | -    | In-vitro            | <a href="https://www.ncbi.nlm.nih.gov/pmc/articles/PMC7110990/">https://www.ncbi.nlm.nih.gov/pmc/articles/PMC7110990/</a><br><a href="https://pubmed.ncbi.nlm.nih.gov/25532798/">https://pubmed.ncbi.nlm.nih.gov/25532798/</a>                                                                                                                                                          |
|  | Lectins                                                 | vacuolin-1                                     | V-ATPase & RAB5A GTPase r    | -    | -                   | <a href="https://pubmed.ncbi.nlm.nih.gov/25532798/">https://pubmed.ncbi.nlm.nih.gov/25532798/</a>                                                                                                                                                                                                                                                                                       |
|  |                                                         | Bafilomycin A1, cyanovirin N & concanamycin A, | V-ATPase                     | -    | In-vitro            | <a href="https://pubmed.ncbi.nlm.nih.gov/25532798/">https://pubmed.ncbi.nlm.nih.gov/25532798/</a>                                                                                                                                                                                                                                                                                       |

|  |  |  |  |  |  |                                                                                                                           |
|--|--|--|--|--|--|---------------------------------------------------------------------------------------------------------------------------|
|  |  |  |  |  |  | <a href="https://www.ncbi.nlm.nih.gov/pmc/articles/PMC7110990/">https://www.ncbi.nlm.nih.gov/pmc/articles/PMC7110990/</a> |
|--|--|--|--|--|--|---------------------------------------------------------------------------------------------------------------------------|

ECMO-extracorporeal membrane oxygenation, VEGF - angiogenic vascular endothelial growth factor, VIP - Vasoactive Intestinal polypeptide- PGE2 - Prostaglandin E2, IFN- Interferons, Monoclonal Abs- Monoclonal antibodies, IVIG -Intravenous Immunoglobulin G, rhuGM-CSF- yeast-derived recombinant humanized GM-CSF, ISG- Interferon stimulated gene, IV-Intravenous, IM-Intramuscular, IP- Intraperitoneal, SC-subcutaneous, TLR4- toll like receptor, PP1- protein phosphatases 1, PP2A- protein phosphatases 2A



**Supplementary Table S2. An overview of COVID-19 and EVD vaccines under clinical trial based on common vaccine platforms.**

| Vaccine platform | Disease  | Commercial name                                             | Name of company                                              | Immunogen        | Phase of vaccine development/Clinical trial Identifier number |
|------------------|----------|-------------------------------------------------------------|--------------------------------------------------------------|------------------|---------------------------------------------------------------|
| DNA              | COVID-19 | ZyCoV-D                                                     | Zyodus Cadila, Cadila Healthcare Ltd, India                  | S +IgE           | Phase 3, CTRI/2021/01/030416                                  |
|                  |          | INO-4800                                                    | Inovio Pharmaceuticals, International Vaccine Institute      | S                | Phase 3, NCT04336410                                          |
|                  |          | AG0301-COVID19                                              | AnGes Inc., Osaka University, Takara Bio                     | S                | Phase 3, NCT04463472                                          |
|                  |          | Covigenix VAX-001                                           | Entos Pharmaceuticals Inc.                                   | S                | Phase 2, NCT04591184                                          |
|                  |          | COVID-eVax                                                  | Takis                                                        | S                | Phase 2, NCT04788459                                          |
|                  |          | VB10.2210                                                   | Nykode Therapeutics                                          | S & non-S T-cell | Phase 2, NCT05069623                                          |
|                  |          | VB10.2129                                                   | Nykode Therapeutics                                          | RBD              | Phase 2, NCT05069623                                          |
|                  |          | GLS-5310                                                    | GeneOne Life Science Inc                                     | S                | Phase 1, NCT04673149                                          |
|                  |          | bacTRL-Spike                                                | Symvio                                                       | S                | Phase 1, NCT04334980                                          |
|                  |          | COVIGEN                                                     | University of Sydney                                         | S                | Phase 1, NCT04742842                                          |
|                  |          | COVIDITY                                                    | Scancell                                                     | S, N             | Phase 1, NCT05047445                                          |
|                  |          | CorVax12                                                    | Providence Health & Service                                  | S                | Phase1, NCT04627675                                           |
|                  | EVD      | INO-4212/SynCon (INO-4201 + INO-4202)                       | Inovio Pharmaceuticals                                       | GP, NP           | Phase 1, NCT02464670                                          |
| ChAd             | COVID-19 | AZD 1222 (ChAdOx1 nCoV-19)                                  | AstraZeneca/Oxford University                                | S                | Phase 3, NCT05126992                                          |
|                  |          | Covishield (ChAdOx1_nCoV19)                                 | Serum Institute of India                                     | S                | Phase 3, NCT04794946                                          |
|                  |          | ChAdV68-S                                                   | NIAID                                                        | S                | Phase 1, NCT04776317                                          |
|                  | EVD      | ChAd3-EBOZ with or without Mvabea (cAd3-ZEBOV; ChAd3-EBO-Z) | GlaxoSmith Kline Okairos & NIAID, Sabin Vaccine Institute    | GP               | Phase 1/2, NCT03583606                                        |
|                  |          | chAd3-Marburg                                               | Sabin Vaccine Institute                                      | GP               | Phase 1, NCT03475056                                          |
| Ad26             | COVID-19 | Janssen (Ad26.COV2. S)                                      | Johnson & Johnson (Janssen Biotech Inc.)                     | S                | Phase 3, NCT05220397                                          |
|                  |          | SC-Ad6-1                                                    | Tetherex Pharmaceuticals Co.                                 | S                | Phase 1, NCT04839042                                          |
|                  |          | Sputnik/ Gam-COVID-Vac (rAd26 + Ad5)                        | Gamaleya Research Institute of Epidemiology and Microbiology | S                | NCT04642339                                                   |
|                  |          | Sputnik Light                                               | Gamaleya Research Institute of Epidemiology and Microbiology | S                | Phase 3, NCT04741061                                          |

|                 |          |                                                                       |                                                                                 |        |                                     |
|-----------------|----------|-----------------------------------------------------------------------|---------------------------------------------------------------------------------|--------|-------------------------------------|
|                 | EVD      | Zabdeno/Mvabe <sup>a</sup><br>(Ad26.ZEBOV + heterologous MVA-BN-Filo) | Johnson & Johnson<br>(Janssen Biotech Inc.)                                     | GP, NP | Phase 3, NCT05064956                |
|                 |          |                                                                       |                                                                                 |        |                                     |
| Ad5             | COVID-19 | Convidecia<br>(Ad5-nCoV)                                              | CanSino Biologics                                                               | S      | Phase 3, NCT05313646                |
|                 |          | hAd5-Covid19                                                          | Immunity Bio Inc                                                                | S & N  | Phase 2, NCT04845191                |
|                 |          | VXA-CoV2-1.1-S                                                        | Vaxart                                                                          | S & N  | Phase2, NCT05067933                 |
|                 |          | AdCLD-CoV19                                                           | Cellid Co                                                                       | S      | Phase 2, NCT05047692                |
|                 |          | Ad5-triCoV/Mac                                                        | McMaster University                                                             | S      | Phase 1, NCT05094609                |
|                 | EVD      | Ad5-EBOV                                                              | Beijing Institute of Biotechnology & CanSino Bio                                | GP     | Phase 2, NCT02533791                |
| Protein subunit | COVID-19 | NVX-CoV2373<br>(Nuvaxoid)                                             | Novavax<br>(Gaithersburg, USA)                                                  | S-RBD  | Phase 3, NCT05249816                |
|                 |          | Covovax                                                               | Serum Institute of India                                                        | S-RBD  | Phase 3, ictrp-CTRI202204042017     |
|                 |          | TAK-019                                                               | Takeda, Tokyo, Japan (based on Novavax formulation)                             | S      | Phase 3, NCT05299359                |
|                 |          | Abdala                                                                | Center for Genetic Engineering and Biotechnology                                | S      | Phase 3, ictrp-RPCEC00000359        |
|                 |          | EpiVacCorona                                                          | Vector State Research Center for Virology and Biotechnology, Russian Federation | S      | Phase 3, NCT04527575                |
|                 |          | Corbevax                                                              | Biological E Limited, Hyderabad, India                                          | S      | Phase 3, ictrp-CTRI202108036074     |
|                 |          | ZifiVax<br>(ZF2001/ZF-UZ-VAC 2001)                                    | Anhui Zhifei Longcom, Beijing, People's Republic of China                       | S-RBD  | Phase 3, NCT04646590                |
|                 |          | Noora Vaccine                                                         | Bagheit-allah University of Medical Sciences                                    | S      | Phase 3, ictrp-IRCT20210620051639N3 |
|                 |          | MVC-COV1901                                                           | Medigen, Taipei, Taiwan                                                         | S      | NCT04695652                         |
|                 |          | Aurora-CoV<br>(EpiVacCorona-N)                                        | Vector State Research Center for Virology and Biotechnology, Russian Federation | S      | Phase 2, NCT04527575                |
|                 |          | Soberana Plus<br>(FNILAY -FR-1A)                                      | Institute Finaly de Vacunas                                                     | S      | Phase 3, RPCEC00000374              |
|                 |          | MVC-COV1901                                                           | Medigen                                                                         | S-2P   | Phase 3, NCT04695652                |
|                 |          | Razi Cov Pars                                                         | Razi Vaccine and Serum Research Institute                                       | S      | Phase 3, ictrp-IRCT20201214049709N5 |

|               |          |                                                                       |                                                                                           |    |                              |
|---------------|----------|-----------------------------------------------------------------------|-------------------------------------------------------------------------------------------|----|------------------------------|
|               |          | Sponge<br>(COVAX-19)                                                  | Vaxine/CinnaGen<br>Co                                                                     | S  | Phase 3, NCT04453852         |
|               |          | EVD Filovirus<br>glycoprotein                                         | University of<br>Hawaii, BIOQUAL<br>Inc., Galveston<br>National Lab                       | GP | Pre-clinic/NHP, NCT05079750  |
|               | COVID-19 | Brilife/IIBR-100<br>(VSV-ΔG<br>SARS-CoV-2)                            | Israel Institute for<br>Biological Research                                               | S  | Phase 3, NCT04990466         |
| VSV           | EVD      | Ervebo<br>(rVSVΔG-<br>ZEBOV/<br>rVSVΔG-<br>ZEBOV-GP)                  | Merck<br>NewLink Genetics<br>PHAC (National<br>Microbiology<br>Laboratory in<br>Winnipeg) | GP | Phase 3, NCT05202288         |
|               |          | GamEvac-<br>Combi and<br>GamEvacLyo<br>(Heterologous<br>rVSV and Ad5) | Gamaleya Research<br>Institute of<br>Epidemiology and<br>Microbiology<br>(Russia)         | GP | Phase 4, NCT02911415         |
| VLPs          | COVID-19 | LYB001                                                                | Yantai Patronus<br>Biotech Co Ltd                                                         | -  | Phase 3, NCT05137444         |
|               |          | SARS-CoV-2<br>VLP Vaccine                                             | The STRCT                                                                                 | VP | Phase 2, NCT04962893         |
|               |          | VBI-2902a                                                             | VBI Vaccine Inc.                                                                          | S  | Phase 2, NCT04773665         |
| Nanoparticles | COVID-19 | COVID-19-EDV                                                          | EnGeneIC                                                                                  | S  | Phase 1, ACTRN12621001159842 |
|               |          | SAM-LNP-S                                                             | NIAID                                                                                     | S  | Phase 1, NCT04776317         |
